# Supplementary material for: Remnants from the Past: From an 18th Century Manuscript to 21st Century Ethnobotany in Valle Imagna (Bergamo, Italy)
Source: MDPI journal article supplement (doi:10.3390/plants12142748), 2023-07-24
Supplement: s1 [file s1]

**Table S1:** Traditional medicinal uses in 21<sup>st</sup> century Valle Imagna and related bibliographic research. For the complete reference list, please see the main text. CS = Circulatory system disorders; DIG = Digestive tract disorders; EAR = Afflictions of the ear; FE = Fever; GC = General condition; GYN = Gynaecological disorders, obstetric, and puerperal problems; MSK = Musculoskeletal system disorders and traumas; NS = Nervous system disorders; OR = Oropharyngeal cavity affections; OPT = Ophthalmic ailments; RES = Respiratory tract infections; UR = Urinary tract disorders; SK = Skin diseases and traumas; SL = Slimming.

| Scientific name,<br>italian/english<br>common name,<br>vernacular name          | Traditional uses in Valle Imagna                     |                              |              |                                                  | Bibliographic<br>research:<br>Ethnobotany | Bibliographic<br>research: Biological<br>activity                         | Bibliographic research:<br>Phytochemistry linked to<br>the biological activity                                                   |
|---------------------------------------------------------------------------------|------------------------------------------------------|------------------------------|--------------|--------------------------------------------------|-------------------------------------------|---------------------------------------------------------------------------|----------------------------------------------------------------------------------------------------------------------------------|
|                                                                                 | Part of plant<br>and<br>preparation                  | Category of<br>use/Apparatus | Detailed use |                                                  |                                           |                                                                           |                                                                                                                                  |
| <b>Amaranthaceae</b>                                                            |                                                      |                              |              |                                                  |                                           |                                                                           |                                                                                                                                  |
| <i>Blitum bonus-henricus</i> (L.) Rchb.<br>Buon Enrico/Wild<br>spinach<br>Parüc | Leaves<br>(infusion)                                 | Med                          | OR           | Gingivitis, toothache,<br>aphthae, and abscesses |                                           |                                                                           |                                                                                                                                  |
|                                                                                 | Leaves<br>(infusion)                                 | Med                          | RES          | Cough                                            |                                           |                                                                           |                                                                                                                                  |
|                                                                                 | Leaves<br>(infusion)                                 | Med                          | GC           | Depurative                                       |                                           |                                                                           |                                                                                                                                  |
| <b>Amaryllidaceae</b>                                                           |                                                      |                              |              |                                                  |                                           |                                                                           |                                                                                                                                  |
| <i>Allium cepa</i> L.<br>Cipolla/Onion<br>Scigóla                               | Underground<br>organs<br>(externally as<br>it is)    | Med                          | SK           | Insect bites                                     | [33,44–46]                                | Anti-inflammatory,<br>antibacterial [47]<br><br>Anti-allergic effect [48] |                                                                                                                                  |
| <i>Allium sativum</i> L.<br>Aglío/Garlic<br>Aj                                  | Underground<br>organs<br>(ointment)                  | Med                          | MSK          | Contusions                                       |                                           | Anti-inflammatory<br>(oral use)<br>[49,50]                                | Anti-inflammatory: Alliin,<br>diallyl sulfide, diallyl<br>disulfide, diallyl trisulfide,<br>ajoene e S-allyl-cysteine<br>[49,50] |
| <i>Allium ursinum</i> L.<br>Aglío ursino/Ursin<br>garlic                        | Leaves<br>(preparation<br>similar to<br>pesto sauce) | Med                          | GC           | Tonic and corroborant                            |                                           |                                                                           |                                                                                                                                  |
| <b>Apiaceae</b>                                                                 |                                                      |                              |              |                                                  |                                           |                                                                           |                                                                                                                                  |
| <i>Angelica sylvestris</i><br>L.                                                | Fruits,<br>infructescence                            | Med                          | GC           | Anti-inflammatory                                |                                           | Anti-inflammatory<br>[51]                                                 |                                                                                                                                  |

|                                                                                            |                                                                                   |     |     |                                                      |                                 |      |                                      |
|--------------------------------------------------------------------------------------------|-----------------------------------------------------------------------------------|-----|-----|------------------------------------------------------|---------------------------------|------|--------------------------------------|
| Angelica/Wild<br>angelica                                                                  | s, accessory<br>fruits<br>(infusion)                                              |     |     |                                                      |                                 |      |                                      |
| <i>Daucus carota</i> L.<br>Carota/Carrot                                                   | Underground<br>organs<br>(decoction)                                              | Med | GC  | Anti-inflammatory                                    |                                 |      |                                      |
| <i>Petroselinum<br/>crispum</i> (Mill.)<br>Fuss<br>Prezzemolo/Parsle<br>y                  | Underground<br>organs<br>(decoction)                                              | Med | GC  | Depurative                                           |                                 |      |                                      |
|                                                                                            | Leaves<br>(applied as<br>they are)                                                | Med | SK  | Insect bites                                         | [44,45]                         |      |                                      |
| <b>Araliaceae</b>                                                                          |                                                                                   |     |     |                                                      |                                 |      |                                      |
| <i>Hedera helix</i> L.<br>Edera/Poison ivy                                                 | Leaves<br>(macerated<br>oil)                                                      | Med | CS  | Improves circulation                                 | [33] (Different<br>preparation) | [52] | Hederagenin, oleanolic<br>acid. [52] |
| <b>Asparagaceae</b>                                                                        |                                                                                   |     |     |                                                      |                                 |      |                                      |
| <i>Asparagus<br/>officinalis</i> L.<br>Asparago/Asparag<br>us<br>Spàres                    | Shoots<br>(eaten<br>cooked)                                                       | Med | DIG | Liver depurative                                     |                                 | [53] |                                      |
| <i>Polygonatum<br/>multiflorum</i> (L.)<br>All.<br>Sigillo di<br>Salomone/ David's<br>harp | Leaves<br>(applied as<br>they are)                                                | Med | SK  | Anti-inflammatory,<br>disinfectant, wound<br>healing |                                 |      |                                      |
|                                                                                            | Underground<br>organs<br>(hydroalcohol<br>ic macerated,<br>applied<br>externally) | Med | MSK | Contusions                                           |                                 |      |                                      |
| <b>Aspleniaceae</b>                                                                        |                                                                                   |     |     |                                                      |                                 |      |                                      |

|                                                                          |                                                                      |     |     |                                        |         |                                                                                                                                                                                          |
|--------------------------------------------------------------------------|----------------------------------------------------------------------|-----|-----|----------------------------------------|---------|------------------------------------------------------------------------------------------------------------------------------------------------------------------------------------------|
| <i>Ceterach officinarum</i> Willd.<br>Spaccapietra/<br>Rustyback         | Underground organs<br>(hydroalcoholic macerated, applied externally) | Med | MSK | Contusions                             |         |                                                                                                                                                                                          |
| <b>Asteraceae</b>                                                        |                                                                      |     |     |                                        |         |                                                                                                                                                                                          |
| <i>Achillea millefolium</i> L.<br>Achillea millefoglio/Comm<br>on yarrow | Flowers, inflorescences, flowering tops (infusion)                   | Med | CS  | Blood depurative                       | [34]    | Anti-inflammatory: Sesquiterpene santamarin: [54]                                                                                                                                        |
|                                                                          | Flowers, inflorescences, flowering tops (infusion)                   | Med | GYN | Menstrual pain                         | [34,37] | Anti-inflammatory: Dicafeoylquinic acids, flavonoids, proazulenic sesquiterpene lactone (matricin) [55]                                                                                  |
|                                                                          | Flowers, inflorescences, flowering tops (macerated oil)              | Med | GYN | Menstrual pain                         |         | Anti-bacterial: E.O. [55]<br><br>Potential estrogenic activity: flavonoids (apigenin, luteolin) [55]                                                                                     |
|                                                                          | Flowers, inflorescences, flowering tops (infusion)                   | Med | GYN | Emmenagogue, regulates menstrual cycle |         | Emmenagogue, attività estrogenica [55–57]<br><br>Anti-bacterial, antioxidant and anti-nociceptive: E.O. (terpinolene, 1,8-cineol, thujone, $\gamma$ -terpinene, borneol, camphor), rutin |
|                                                                          | Flowers, inflorescences, flowering tops (infusion)                   | Med | GC  | Anti-inflammatory                      | [33]    |                                                                                                                                                                                          |

|                                                     |                                                         |     |     |                                                 |                     |                                                            |                                                                                                                                                |
|-----------------------------------------------------|---------------------------------------------------------|-----|-----|-------------------------------------------------|---------------------|------------------------------------------------------------|------------------------------------------------------------------------------------------------------------------------------------------------|
|                                                     | Flowers, inflorescences, flowering tops (macerated oil) | Med | SK  | Anti-inflammatory, disinfectant, wound healing  | [33,34,37,58,59]    | Antinfiammatoria, antibatterica [55]<br>Antibatterica [56] | Anti-inflammatory: apigenin 7-O-glucoside, luteolin 7-O-glucoside<br><br>Antispasmodic: quercetin, apigenin e luteolin                         |
|                                                     | Flowers, inflorescences, flowering tops (macerated oil) | Med | SK  | Anti-inflammatory, emollient, soothing, redness | [33,34,37,58,59]    | Antinfiammatoria, antibatterica [55]                       | Choleretic: luteolin-7-O-beta-D-glucuronide<br><br>Estrogenic activity: dihydrodehydrodiconiferyl alcohol, and 9-O-beta-D-glucopyranoside [56] |
|                                                     | Flowers, inflorescences, flowering tops (macerated oil) | Med | MSK | Contusions<br>Ematomi                           | [34]                | Antinfiammatoria [54–56]                                   |                                                                                                                                                |
|                                                     | Flowers, inflorescences, flowering tops (macerated oil) | Med | MSK | Pain and inflammation                           | [33,34]             | Antinfiammatoria [54–56]                                   |                                                                                                                                                |
|                                                     | Above ground parts (infusion)                           | Med | UR  | Diuretic                                        | [37]                |                                                            |                                                                                                                                                |
| <i>Arctium lappa</i> L.<br>Bardana/ Greater burdock | Leaves (externally applied)                             | Med | MSK | Joint pain and inflammation                     | [36,37]             |                                                            |                                                                                                                                                |
| <i>Arnica montana</i> L.<br>subsp. <i>montana</i>   | Flowers, inflorescences, flowering tops                 | Med | MSK | Contusions                                      | [32–34,36,37,59,60] | Anti-inflammatory [61–64]                                  | Analgesic and anti-inflammatory: sesquiterpene lactone helenanin [61,64–66]                                                                    |

|                                                                  |                                                                                            |     |       |                                |                             |                              |                                                                                                       |
|------------------------------------------------------------------|--------------------------------------------------------------------------------------------|-----|-------|--------------------------------|-----------------------------|------------------------------|-------------------------------------------------------------------------------------------------------|
| Arnica<br>montana/Mountain tobacco                               | (macerated oil<br>alcoholic<br>extract)                                                    |     |       |                                |                             |                              | Anti-inflammatory:<br>sesquiterpene lactones<br>helenanin and<br>dihydrohelenanin<br>[61,62,67]       |
|                                                                  | Flowers,<br>inflorescences<br>, flowering<br>tops<br>(alcoholic<br>extract or<br>ointment) | Med | MSK   | Pain and inflammation          | [32–<br>34,36,37,60]        | Anti-inflammatory<br>[61–64] |                                                                                                       |
|                                                                  | Flowers,<br>inflorescences<br>, flowering<br>tops<br>(compresses<br>with infusion)         | Med | MSK   | Joint pain and<br>inflammation | [32–<br>34,36,37,60]        | Anti-inflammatory<br>[61–64] |                                                                                                       |
| <i>Artemisia<br/>absinthium</i> L.<br>Assenzio/Absinth<br>Mistrù | Flowers,<br>inflorescences<br>, flowering<br>tops<br>(infusion)                            | Med | Other | Scurvy                         |                             |                              |                                                                                                       |
|                                                                  | Flowers,<br>inflorescences<br>, flowering<br>tops<br>Above<br>ground parts<br>(infusion)   | Med | DIG   | Digestive                      | [32–<br>34,37,46,58–<br>60] | [67–71]                      | Digestive: sesquiterpene<br>lactones (absinthin,<br>anabsinthin, arthabsin,<br>anabsin) [67,68,70,71] |
|                                                                  | Flowers,<br>inflorescences<br>, flowering<br>tops<br>(infusion)                            | Med | DIG   | Carminative                    |                             |                              |                                                                                                       |
|                                                                  | Flowers,<br>inflorescences                                                                 | Med | UR    | Kidney stones                  |                             |                              |                                                                                                       |

|                                                       |                                                                                                 |     |     |                                                 |                  |                                        |                                                                                                                                                                                                                                                                                       |
|-------------------------------------------------------|-------------------------------------------------------------------------------------------------|-----|-----|-------------------------------------------------|------------------|----------------------------------------|---------------------------------------------------------------------------------------------------------------------------------------------------------------------------------------------------------------------------------------------------------------------------------------|
|                                                       | , flowering tops (infusion)                                                                     |     |     |                                                 |                  |                                        |                                                                                                                                                                                                                                                                                       |
|                                                       | Flowers, inflorescences, flowering tops (infusion)                                              | Med | FE  | Antipyretic                                     | [33,46,60,72]    | [73]                                   |                                                                                                                                                                                                                                                                                       |
|                                                       | Leaves (infusion)                                                                               | Med | NS  | Sedative hypnotic, promotes sleep               |                  | [74]                                   |                                                                                                                                                                                                                                                                                       |
|                                                       | Above ground parts (decoction)                                                                  | Med | INF | Laxative in infants                             |                  |                                        |                                                                                                                                                                                                                                                                                       |
|                                                       | Above ground parts (infusion)                                                                   | Med | UR  | Diuretic                                        |                  |                                        |                                                                                                                                                                                                                                                                                       |
|                                                       | Above ground parts (infusion)                                                                   | Med | GC  | Anti-inflammatory                               |                  | Anti-inflammatory and antioxidant [75] |                                                                                                                                                                                                                                                                                       |
| <i>Calendula officinalis</i> L.<br>Calendula/Marigold | Flowers, inflorescences, flowering tops (alcoholic extract, macerated oil, applied as they are) | Med | SK  | Anti-inflammatory, emollient, soothing, redness | [33,34,37,44,46] | [67,76–79]                             | Anti-inflammatory: quercetin [78]<br><br>Anti-inflammatory: triterpenoid esters (faradiol-3-O-laurate, faradiol-3-O-palmitate efaradiol-3-O-myristate)<br>Inhibition of collagen degradation: quercetin<br>Stimulation of primary fibroblasts: quercetin-3-O-glucoside and rutin [77] |
|                                                       | Flowers, inflorescences, flowering tops (macerated oil)                                         | Med | SK  | Sunburn, burns, frostbites, redness, and rash   | [33,34,37,44]    | [67,76–79]                             |                                                                                                                                                                                                                                                                                       |
|                                                       |                                                                                                 |     |     |                                                 |                  |                                        |                                                                                                                                                                                                                                                                                       |

|                                                                               |                                                                                                       |     |     |                                      |      |                                                                                                              |
|-------------------------------------------------------------------------------|-------------------------------------------------------------------------------------------------------|-----|-----|--------------------------------------|------|--------------------------------------------------------------------------------------------------------------|
|                                                                               | Flowers,<br>inflorescences<br>, flowering<br>tops<br>(alcoholic<br>extract)                           | Med | MSK | Contusions                           | -    | Wound healing:<br>carotenoids [80]<br>Anti-inflammatory and<br>anti-edema: terpenoids<br>and flavonoids [81] |
|                                                                               | Flowers,<br>inflorescences<br>, flowering<br>tops<br>(macerated<br>oil)                               | Med | MSK | Muscle pain and<br>inflammation      | [34] | -                                                                                                            |
|                                                                               | Flowers,<br>inflorescences<br>, flowering<br>tops<br>(infusion<br>drunk,<br>macerated oil<br>applied) | Med | NS  | Sedative hypnotic,<br>promotes sleep |      |                                                                                                              |
|                                                                               | Flowers,<br>inflorescences<br>, flowering<br>tops<br>(infusion)                                       | Med | GC  | Anti-inflammatory                    |      |                                                                                                              |
| <i>Centaurea<br/>benedicta</i> (L.) L.<br>Cardo benedetto/<br>Blessed thistle | Flowers,<br>inflorescences<br>, flowering<br>tops<br>(decoction)                                      | Med | CS  | Improves cardiac<br>functions        |      |                                                                                                              |
|                                                                               | Flowers,<br>inflorescences<br>, flowering<br>tops<br>(decoction)                                      | Med | DIG | Digestive                            |      |                                                                                                              |

|                                                                         |                                                                                |     |     |                                                       |                             |                                          |                                                                                                         |
|-------------------------------------------------------------------------|--------------------------------------------------------------------------------|-----|-----|-------------------------------------------------------|-----------------------------|------------------------------------------|---------------------------------------------------------------------------------------------------------|
| <i>Cyanus segetum</i> Hill<br>Fiordaliso/<br>Bachelor's button          | Flowers,<br>inflorescences<br>, flowering<br>tops<br>(infusion,<br>compresses) | Med | OPT | Eye anti-inflammatory                                 | [36,60]                     |                                          |                                                                                                         |
| <i>Helianthus tuberosus</i> L.<br>Topinambur/<br>Jerusalem<br>artichoke | Underground<br>organs<br>(eaten<br>cooked)                                     | Med | DIG | Liver depurative                                      |                             | [82]                                     |                                                                                                         |
|                                                                         | Underground<br>organs<br>(eaten<br>cooked)                                     | Med | UR  | Diuretic                                              |                             |                                          |                                                                                                         |
| <i>Matricaria chamomilla</i> L.<br>Camomilla/Chamomile                  | Flowers/inflor<br>escences/flow<br>ering tops<br>(infusion)                    | Med | DIG | Digestive                                             | [33,44,45]                  | Attività<br>antispasmodica<br>[76,83]    |                                                                                                         |
|                                                                         | Flowers/inflor<br>escences/flow<br>ering tops<br>(infusion)                    | Med | NS  | Sedative hypnotic,<br>promotes sleep                  | [32–<br>34,36,37,44–<br>46] | Attività ansiolitica<br>[67,83]          | Anti-inflammatory:<br>apigenin [67,76,83,84]<br>Anxiolytic and<br>antispasmodic: apigenin<br>[67,83,85] |
|                                                                         | Flowers/inflor<br>escences/flow<br>ering tops<br>(macerated<br>oil)            | Med | SK  | Anti-inflammatory,<br>emollient, soothing,<br>redness | [33]                        | Anti-inflammatory,<br>wound healing [86] | Antispasmodic: bisabolol<br>[83]<br>Anti-inflammatory:<br>bisabolol [76]                                |
|                                                                         | Flowers/inflor<br>escences/flow<br>ering tops<br>(macerated<br>oil)            | Med | SK  | Sunburn, burns,<br>frostbites, redness, and<br>rash   | [33]                        | Anti-inflammatory,<br>wound healing [86] | Anti-inflammatory and<br>spasmolytic: matricin [76]                                                     |
|                                                                         | Flowers/inflor<br>escences/flow<br>ering tops                                  | Med | MSK | Muscle pain and<br>inflammation                       | [33]                        | [86]                                     |                                                                                                         |



|                                                                 |                                                    |     |     |                                     |         |      |                                                                                   |
|-----------------------------------------------------------------|----------------------------------------------------|-----|-----|-------------------------------------|---------|------|-----------------------------------------------------------------------------------|
|                                                                 | (macerated oil)                                    |     |     |                                     |         |      |                                                                                   |
| <i>Silybum marianum</i> (L.) Gaertn. Cardo mariano/Milk thistle | Flowers/inflor escences/flowering tops (decoction) | Med | CS  | Improves cardiac functions          |         | [87] | Cardioprotective: silymarin [87]                                                  |
|                                                                 | Flowers/inflor escences/flowering tops (decoction) | Med | DIG | Digestive                           |         |      |                                                                                   |
| <i>Taraxacum</i> sect, <i>Taraxacum</i> Tarassaco/Dandelion     | Flowers/inflor escences/flowering tops (infusion)  | Med | DIG | Digestive                           | [36,45] | [88] | Digestive: bitter sesquiterpene lactones [88]                                     |
|                                                                 | Flowers/inflor escences/flowering tops (infusion)  | Med | DIG | Liver depurative                    | [36,37] |      | Cholesterol: triterpenes and phytosterols ( $\beta$ -sitosterol and amidiol) [89] |
|                                                                 | Flowers/inflor escences/flowering tops (syrup)     | Med | RES | Sore throat and hoarseness<br>Cough | [33,37] |      | Prebiotics: polysaccharides [88]                                                  |
|                                                                 | Flowers/inflor escences/flowering tops (syrup)     | Med | GC  | Depurative                          | [33]    |      | Hepatoprotective: complex polysaccharides (inulin) [88]                           |
|                                                                 | Leaves (decoction, eaten cooked)                   | Med | CS  | Blood depurative                    | [36]    |      | Decreases cholesterol absorption [89]                                             |
|                                                                 | Leaves (decoction, infusion, eaten cooked)         | Med | DIG | Liver depurative                    | [36,46] |      | Hepatoprotective [88]                                                             |

|                                                           |                                                                                      |     |     |                         |                  |                                               |                                                                                                                        |
|-----------------------------------------------------------|--------------------------------------------------------------------------------------|-----|-----|-------------------------|------------------|-----------------------------------------------|------------------------------------------------------------------------------------------------------------------------|
|                                                           | Leaves<br>(eaten<br>cooked)                                                          | Med | DIG | Laxative, bowel transit | [90]             | Prebiotics [88]                               |                                                                                                                        |
|                                                           | Leaves<br>(eaten<br>cooked)                                                          | Med | UR  | Diuretic                | [36]             | Diuretic [89]                                 |                                                                                                                        |
|                                                           | Underground<br>organs<br>(eaten<br>cooked)                                           | Med | CS  | Blood depurative        | [32,36,60]       | Decreases cholesterol<br>absorption [89]      |                                                                                                                        |
|                                                           | Underground<br>organs<br>(decoction)                                                 | Med | DIG | Liver depurative        | [32,36,44]       | Liver disorders [89]<br>Hepatoprotective [88] |                                                                                                                        |
|                                                           | Underground<br>organs<br>(decoction)                                                 | Med | GC  | Tonic and corroborant   |                  |                                               |                                                                                                                        |
| <i>Tussilago farfara</i> L.<br>Tossilaggine/<br>Coltsfoot | Flowers/inflor<br>escences/flow<br>ering tops<br>(infusion)                          | Med | RES | Cough                   | [33,36,37,59,60] | Antitussivo,<br>espettorante<br>[91,92]       | Antitussive:<br>Caffeoylquinic acids from<br>flowers [92]                                                              |
|                                                           | Leaves<br>Underground<br>organs<br>(alcoholic<br>macerate,<br>externally<br>applied) | Med | MSK | Contusions              |                  |                                               | Antitussive: Terpenoids,<br>organic acids, flavonoids,<br>alkaloids, chromones,<br>volatile oil in the flowers<br>[91] |
| <b>Betulaceae</b>                                         |                                                                                      |     |     |                         |                  |                                               |                                                                                                                        |
| <i>Betula<br/>pendula</i> Roth<br>Betulla/Birch           | Fusti<br>legnosi/rami/r<br>ametti/polloni<br>(used as<br>whip)                       | Med | CS  | Improves circulation    |                  |                                               |                                                                                                                        |
|                                                           | Latice o linfa<br>(drunk as it is)                                                   | Med | UR  | Diuretic<br>Depurative  |                  |                                               |                                                                                                                        |

|                                                                       |                                      |     |     |                                                    |               |                                                               |                                    |
|-----------------------------------------------------------------------|--------------------------------------|-----|-----|----------------------------------------------------|---------------|---------------------------------------------------------------|------------------------------------|
|                                                                       | Lattice o linfa<br>(drunk as it is)  | Med | GC  | Tonic and corroborant                              | [34]          | [93]                                                          |                                    |
| <b>Boraginaceae</b>                                                   |                                      |     |     |                                                    |               |                                                               |                                    |
| <i>Symphytum officinale</i> L.                                        | Leaves<br>(poultice with green clay) | Med | NS  | Sciatica and neuralgia                             |               |                                                               |                                    |
| Consolida maggiore/Comfrey                                            | Leaves<br>(compresses with infusion) | Med | MSK | Fractures                                          |               |                                                               |                                    |
|                                                                       | Leaves<br>(compresses with infusion) | Med | MSK | Joint pain and inflammation                        | [60]          | [94,95]                                                       |                                    |
| <b>Brassicaceae</b>                                                   |                                      |     |     |                                                    |               |                                                               |                                    |
| Arthrosis                                                             |                                      |     |     |                                                    |               |                                                               |                                    |
| <i>Brassica oleracea</i> L.<br>Verza/Savoy cabbage<br>Vérz            | Leaves<br>(Externally applied)       | Med | MSK | Rheumatic pains<br><br>Joint pain and inflammation | [34,36,44,45] | Anti-inflammatory<br>(several different <i>var.</i> )<br>[96] | Anti-inflammatory: nicotin<br>[96] |
|                                                                       | Leaves<br>(Externally applied)       | Med | MSK | Contusions                                         | [34]          |                                                               |                                    |
| <i>Brassica rapa</i> L.<br>Rapa/Turnip                                | Underground organs<br>(eaten cooked) | Med | GC  | Depurative                                         |               |                                                               |                                    |
| <i>Diplotaxis tenuifolia</i> (L.) DC.<br>Rucola selvatica/Wild rocket | Leaves<br>(eaten raw)                | Med | DIG | Digestive                                          | [44]          |                                                               |                                    |
|                                                                       | Leaves<br>(eaten raw)                | Med | DIG | Laxative, bowel transit                            |               |                                                               |                                    |
| <b>Convolvulaceae</b>                                                 |                                      |     |     |                                                    |               |                                                               |                                    |
| <i>Convolvulus arvensis</i> L.                                        | Above ground parts<br>(infusion)     | Med | MSK | Contusions                                         |               |                                                               |                                    |

Convolvolo/Bind  
weed

**Cornaceae**

|                                                    |                                                             |     |    |                       |  |                                                      |  |
|----------------------------------------------------|-------------------------------------------------------------|-----|----|-----------------------|--|------------------------------------------------------|--|
| <i>Cornus mas</i> L.<br>Corniolo/Dogwood<br>Cornàl | Fruits/infructescences/accessory fruits (eaten as they are) | Med | GC | Tonic and corroborant |  | Vitamin C content: 34–100 mg/100 g fresh weight [97] |  |
|----------------------------------------------------|-------------------------------------------------------------|-----|----|-----------------------|--|------------------------------------------------------|--|

**Cupressaceae**

|                                                           |                              |     |     |                                               |      |  |  |
|-----------------------------------------------------------|------------------------------|-----|-----|-----------------------------------------------|------|--|--|
| <i>Juniperus communis</i> L.<br>Ginepro/Juniper<br>Züerna | Galbule (chewed as they are) | Med | DIG | Stomach anti-inflammatory                     | [45] |  |  |
|                                                           | Galbule (alcoholic macerate) | Med | OR  | Gingivitis, toothache, aphthae, and abscesses | [46] |  |  |

**Equisetaceae**

|                                                   |                                       |     |    |                       |               |                     |                                    |
|---------------------------------------------------|---------------------------------------|-----|----|-----------------------|---------------|---------------------|------------------------------------|
|                                                   | Above ground parts (infusion)         | Med | GC | Depurative            |               |                     |                                    |
| <i>Equisetum arvense</i> L.<br>Equiseto/Horsetail | Above ground parts (as aromatic salt) | Med | GC | Tonic and corroborant | [33,34,36,37] | Remineralizing [98] | High concentrations minerals: [98] |
|                                                   | Above ground parts (infusion)         | Med | CS | Hypotensive           |               | Diuretic [98–100]   |                                    |

**Ericaceae**

|                                                                   |                                                |     |     |                               |               |                                                                     |                                                                                           |
|-------------------------------------------------------------------|------------------------------------------------|-----|-----|-------------------------------|---------------|---------------------------------------------------------------------|-------------------------------------------------------------------------------------------|
| <i>Rhododendron ferrugineum</i> L.<br>Rododendro/<br>Rhododendron | Flowers/infructescences/flowering tops (honey) | Med | RES | Sore throat and hoarseness    |               |                                                                     |                                                                                           |
| <i>Vaccinium myrtillus</i> L.<br>Mirtillo<br>nero/Blueberry       | Fruits/infructescences/accessory fruits        | Med | OPT | Improves sight and eye health | [33,36,37,46] | WHO Monograph - Fructus Myrtilli [101] [102–107] (Refuted by [108]) | Improve ocular microcirculation: phenolic compounds (specifically anthocyanins) [101,109] |

|                                                            |                                                                                   |     |     |                                                 |                         |                                              |                                                                                                                                           |
|------------------------------------------------------------|-----------------------------------------------------------------------------------|-----|-----|-------------------------------------------------|-------------------------|----------------------------------------------|-------------------------------------------------------------------------------------------------------------------------------------------|
|                                                            | (eaten as they are)                                                               |     |     |                                                 |                         |                                              | Protection from retinal damage: cyanidin, delphinidin, and malvidin [105]                                                                 |
| <b>Euphorbiaceae</b>                                       |                                                                                   |     |     |                                                 |                         |                                              |                                                                                                                                           |
| <i>Ricinus communis</i> L.<br>Ricino/Castor                | Seeds (castor oil, drunk)                                                         | Med | SK  | Anti-inflammatory, emollient, soothing, redness |                         |                                              | Laxative: ricinoleic acid [110]                                                                                                           |
|                                                            | Seeds (castor oil, drunk)                                                         | Med | DIG | Laxative, bowel transit                         |                         | [110]                                        |                                                                                                                                           |
| <b>Fabaceae</b>                                            |                                                                                   |     |     |                                                 |                         |                                              |                                                                                                                                           |
| <i>Phaseolus vulgaris</i> L.<br>Fagiolo/Bean               | Legume exocarp (decoction)                                                        | Med | MET | Hypocholesterolemic                             |                         | (Black seed variety)[111]                    | Flavonoids and saponins (black seeds) [111]                                                                                               |
| <b>Gentianaceae</b>                                        |                                                                                   |     |     |                                                 |                         |                                              |                                                                                                                                           |
| <i>Gentiana acaulis</i> L.<br>Gentianella/Trum pet gentian | Underground organs (alcoholic macerate, rub on temples)                           | Med | NS  | Headache                                        |                         |                                              |                                                                                                                                           |
| <b>Hypericaceae</b>                                        |                                                                                   |     |     |                                                 |                         |                                              |                                                                                                                                           |
| <i>Hypericum perforatum</i> L.<br>Iperico/St. John's wort  | Flowers/inflor escences/flowering tops (macerated oil, secreted directly applied) | Med | SK  | Anti-inflammatory, disinfectant, wound healing  | [32–37,44–46,58,60,112] | WHO Monograph – Herba Hyperici [54] [67,112] | Antimicrobial: hyperforin, hypericin, and pseudohypericin [112]<br><br>Antioxidant and anti-inflammatory: hyperforin and flavonoids [112] |
|                                                            |                                                                                   |     |     | Anti-inflammatory, emollient, soothing, redness |                         |                                              |                                                                                                                                           |
|                                                            |                                                                                   |     |     | Insect bites                                    |                         |                                              |                                                                                                                                           |
|                                                            |                                                                                   |     |     | Sunburn, burns, frostbites, redness, and rash   |                         |                                              |                                                                                                                                           |

|                                                                 |                                                                        |     |     |                                                                                                                  |                                    |                            |                                                                                                                                                                                                          |
|-----------------------------------------------------------------|------------------------------------------------------------------------|-----|-----|------------------------------------------------------------------------------------------------------------------|------------------------------------|----------------------------|----------------------------------------------------------------------------------------------------------------------------------------------------------------------------------------------------------|
|                                                                 | Flowers/inflor<br>escences/flow<br>ering tops<br>(macerated<br>oil)    | Med | MSK | Contusions                                                                                                       | [32–<br>34,36,37,46,58<br>,60,112] | [112,113]                  |                                                                                                                                                                                                          |
|                                                                 | Flowers/inflor<br>escences/flow<br>ering tops<br>(macerated<br>oil)    | Med | MSK | Arthritis<br>Rheumatic pains                                                                                     | [32–<br>37,46,58,60,11<br>2]       | [112,113]                  |                                                                                                                                                                                                          |
|                                                                 | Flowers/inflor<br>escences/flow<br>ering tops<br>(macerated<br>oil)    | Med | RES | Facilitates respiration                                                                                          |                                    |                            |                                                                                                                                                                                                          |
| <b>Juglandaceae</b>                                             |                                                                        |     |     |                                                                                                                  |                                    |                            |                                                                                                                                                                                                          |
| <i>Juglans regia</i> L.<br>Noce/Walnut                          | Leaves<br>(infusion for<br>baths)                                      | Med | INF | Anti-inflammatory,<br>emollient, soothing,<br>redness                                                            |                                    | [114]                      |                                                                                                                                                                                                          |
|                                                                 | Seeds<br>(oil)                                                         | Med | EAR | Otitis and pains                                                                                                 |                                    |                            |                                                                                                                                                                                                          |
| <b>Lamiaceae</b>                                                |                                                                        |     |     |                                                                                                                  |                                    |                            |                                                                                                                                                                                                          |
| <i>Lavandula<br/>angustifolia</i> Mill.<br>Lavanda/Lavende<br>r | Flowers/inflor<br>escences/flow<br>ering tops<br>(vinegar<br>macerate) | Med | SK  | Hands and feet mycosis                                                                                           |                                    | [115]                      | Wound healing: linalool<br>and linalyl acetate [116]<br>Psoriasis: essential oil,<br>specifically linalool and<br>linalyl acetate as main<br>compounds [117]<br>Sedative: essential oil<br>[115,118–120] |
|                                                                 | Flowers/inflor<br>escences/flow<br>ering tops<br>(macerated<br>oil)    | Med | SK  | Anti-inflammatory,<br>emollient, soothing,<br>redness<br><br>Sunburn, burns,<br>frostbites, redness, and<br>rash |                                    | Wound healing<br>[115,116] |                                                                                                                                                                                                          |

|                                                                                                     |     |     |                                      |            |                                                                                              |
|-----------------------------------------------------------------------------------------------------|-----|-----|--------------------------------------|------------|----------------------------------------------------------------------------------------------|
| Flowers/inflor<br>escences/flow<br>ering tops<br>(macerated<br>oil)                                 | Med | SK  | Psoriasis                            |            | [115,117]<br>[121] (a case of<br>psoriasis allegedly<br>replaced by allergic<br>dermatitis)  |
| Flowers/inflor<br>escences/flow<br>ering tops<br>(macerated<br>oil)                                 | Med | MSK | Muscle pain and<br>inflammation      | [46]       | Anti-inflammatory<br>[122]                                                                   |
| Flowers/inflor<br>escences/flow<br>ering tops<br>(macerated<br>oil)                                 | Med | NS  | Mal di testa                         | [46]       | [123]<br>[124] (headache as one<br>of the adverse<br>reactions to lavender<br>essential oil) |
| Flowers/inflor<br>escences/flow<br>ering tops<br>(macerated<br>oil, infusion)                       | Med | NS  | Sedative hypnotic,<br>promotes sleep | [33,36,44] | [115,118–120]                                                                                |
| Flowers/inflor<br>escences/flow<br>ering tops<br>(infusion)                                         | Med | DIG | Antispasmodic<br>(stomach)           |            | Antispasmodic, ileum<br>[125]                                                                |
| Flowers/inflor<br>escences/flow<br>ering tops<br>(infusion)                                         | Med | DIG | Digestive                            |            |                                                                                              |
| Flowers/inflor<br>escences/flow<br>ering tops<br>(infusion)<br>(with thyme,<br>lemon and<br>ginger) | Med | RES | Facilitates respiration              | [33,36,46] | [126,127]                                                                                    |

|                                                       |                                                                       |     |     |                                                  |                                    |                                                                                                                                                 |                                                                                                                                                                                                                                                                                                                 |
|-------------------------------------------------------|-----------------------------------------------------------------------|-----|-----|--------------------------------------------------|------------------------------------|-------------------------------------------------------------------------------------------------------------------------------------------------|-----------------------------------------------------------------------------------------------------------------------------------------------------------------------------------------------------------------------------------------------------------------------------------------------------------------|
| <i>Melissa officinalis</i> L.<br>Melissa/Lemonbalm    | Flowers/inflor<br>escences/flow<br>ering tops<br>Leaves<br>(infusion) | Med | NS  | Sedative hypnotic,<br>promotes sleep             | [33,35–37,44]                      | [128]                                                                                                                                           | Digestive: rosmarinic acid<br>[129,130]                                                                                                                                                                                                                                                                         |
|                                                       | Leaves<br>(infusion)                                                  | Med | NS  | Antidepressant                                   |                                    | [128]                                                                                                                                           |                                                                                                                                                                                                                                                                                                                 |
|                                                       | Leaves<br>(infusion)                                                  | Med | DIG | Digestive                                        | [33,35,45,46]                      | [129,130]                                                                                                                                       |                                                                                                                                                                                                                                                                                                                 |
| <i>Mentha</i> spp<br>Menta/Mint                       | Leaves<br>(applied as<br>they are)                                    | Med | SK  | Insect bites                                     | [44]                               | Antinociceptive [131]                                                                                                                           | Anti-inflammatory:<br>flavonoids [131]<br>Sedative: mainly phenolic<br>compounds (flavonoids<br>and tannins) [132]<br>Respiratory problems:<br>essential oil [133]; cis-<br>piperitone epoxide,<br>piperitenone oxide,<br>pulegone, and menthone<br>[131]<br>Oropharyngeal cavity:<br>flavonoids; menthol [131] |
|                                                       | Leaves<br>(decoction)                                                 | Med | GC  | Anti-inflammatory                                | [34,37]                            | [131,134–137]                                                                                                                                   |                                                                                                                                                                                                                                                                                                                 |
|                                                       | Leaves<br>(infusion)                                                  | Med | NS  | Sedative hypnotic,<br>promotes sleep             | [33,36]                            | [132,136]                                                                                                                                       |                                                                                                                                                                                                                                                                                                                 |
|                                                       | Leaves<br>(infusion,<br>alcoholic<br>macerate)                        | Med | RES | Cough                                            | [32,33]                            | Antibacterial: [138]<br>[133] (mix of essential<br>oils, <i>M. piperita</i> )                                                                   |                                                                                                                                                                                                                                                                                                                 |
|                                                       | Leaves<br>(inhalation of<br>the infusion)                             | Med | RES | Facilitates respiration                          | [33]                               | [133] (mix of essential<br>oils, <i>M. piperita</i> )                                                                                           |                                                                                                                                                                                                                                                                                                                 |
|                                                       | Leaves<br>(alcoholic<br>macerate)                                     | Med | OR  | Gingivitis, toothache,<br>aphthae, and abscesses | [33]                               | Antinociceptive; anti-<br>inflammatory,<br>antibacterial against<br><i>Staphylococcus mutans</i><br>[131]<br>Anti-inflammatory<br>[135–137,139] |                                                                                                                                                                                                                                                                                                                 |
| <i>Plectranthus<br/>amboinicus</i> (Lour.)<br>Spreng. | Leaves<br>(decoction)                                                 | Med | RES | Asthmatic bronchitis<br>Cough                    | [140,141]<br>(where<br>indigenous) | [140]                                                                                                                                           |                                                                                                                                                                                                                                                                                                                 |



| Origano<br>Cubano/Cuban<br>oregano   |                                                                                       |     |     |                                                                                                             |            |                                                                                                |                                                                                                                                                                                                                                                           |  |
|--------------------------------------|---------------------------------------------------------------------------------------|-----|-----|-------------------------------------------------------------------------------------------------------------|------------|------------------------------------------------------------------------------------------------|-----------------------------------------------------------------------------------------------------------------------------------------------------------------------------------------------------------------------------------------------------------|--|
|                                      | Flowers/inflor<br>escences/flow<br>ering tops<br>(infusion,<br>drunk or for<br>baths) | Med | GC  | Tonic and corroborant                                                                                       | [33,36,44] | Potentially<br>immunomodulating<br>activities [142]<br>Antidepressant-like<br>properties [143] |                                                                                                                                                                                                                                                           |  |
|                                      | Leaves<br>(vinegar<br>macerate)                                                       | Med | SK  | Hands and feet mycosis                                                                                      |            | Antifungal [144]                                                                               |                                                                                                                                                                                                                                                           |  |
|                                      | Leaves<br>(inhalations<br>with infusion)                                              | Med | RES | Expectorant,<br>decongestant, emollient                                                                     | [36,45,46] | [145]<br>[133] (mix of essential<br>oils, <i>R. officinalis</i> )                              | Anti-inflammatory,<br>antinociceptive,<br>antifungal, wound<br>healing: carnosol; carnosic,<br>rosmarinic, ursolic,<br>oleanolic, and micromeric<br>acids. E.O.: $\beta$ - pinene, 1,8-<br>cineole, borneol, camphor,<br>limonene, and verbenone<br>[144] |  |
| <i>Rosmarinus<br/>officinalis</i> L. | Leaves<br>(infusion)                                                                  | Med | DIG | Stomach anti-<br>inflammatory                                                                               | [146,147]  | Anti-inflammatory<br>[144]                                                                     |                                                                                                                                                                                                                                                           |  |
| Rosmarino/Rosem<br>ary               | Leaves<br>(infusion)                                                                  | Med | UR  | Diuretic                                                                                                    | [148]      | [149]                                                                                          |                                                                                                                                                                                                                                                           |  |
|                                      | Leaves<br>(infusion)                                                                  | Med | GC  | Anti-inflammatory                                                                                           |            | Anti-inflammatory<br>[144]                                                                     |                                                                                                                                                                                                                                                           |  |
|                                      | Leaves<br>(infusion,<br>alcoholic<br>macerate)                                        | Med | GC  | Tonic and corroborant                                                                                       | [33,36,44] | Potentially<br>immunomodulating<br>activities [142]<br>Antidepressant-like<br>properties [143] | Respiratory conditions:<br>carnosic acid [145]                                                                                                                                                                                                            |  |
|                                      | Leaves<br>(ointment)                                                                  | Med | SK  | Anti-inflammatory,<br>disinfectant, wound<br>healing<br>Sunburn, burns,<br>frostbites, redness, and<br>rash | [44]       | [144]                                                                                          |                                                                                                                                                                                                                                                           |  |

|                                             |                                                                                       |     |     |                                                                   |               |                                |                                                                                                                       |
|---------------------------------------------|---------------------------------------------------------------------------------------|-----|-----|-------------------------------------------------------------------|---------------|--------------------------------|-----------------------------------------------------------------------------------------------------------------------|
|                                             | Flowers/inflor<br>escences/flow<br>ering tops<br>(infusion,<br>drunk or for<br>baths) | Med | GC  | Tonic and corroborant                                             | [33]          |                                |                                                                                                                       |
|                                             | Leaves<br>(applied as<br>they are,<br>infusion)                                       | Med | OR  | Disinfettante<br>Gingivitis, toothache,<br>aphthae, and abscesses | [33,36,46,60] | [151,153,155]                  | Anti-inflammatory action:<br>flavonoids, rosmarinic<br>acid, manool, carnosol,<br>ursolic acid [150]                  |
|                                             | Leaves<br>(vinegar<br>macerate)                                                       | Med | SK  | Micosi mani e piedi                                               |               |                                | Antimicrobial for oral<br>cavity affections, anti-<br>inflammatory: 1,8-cineole,<br>thujone, and camphor<br>[151,152] |
| <i>Salvia officinalis</i> L.<br>Salvia/Sage | Leaves<br>(applied as<br>they are)                                                    | Med | SK  | Insect bites                                                      | [36]          | Anti-inflammatory<br>[151,154] | Antifungal for oral cavity<br>affections: E.O. [153]                                                                  |
|                                             | Leaves<br>(decoction)                                                                 | Med | GC  | Depurative                                                        |               | Wound healing [156]            |                                                                                                                       |
|                                             | Leaves<br>(decoction,<br>infusion)                                                    | Med | GC  | Anti-inflammatory                                                 |               | Anti-inflammatory<br>[151,154] | Anti-inflammatory: ursolic<br>acid and other diterpenes<br>[151]                                                      |
|                                             | Leaves<br>(infusion)                                                                  | Med | DIG | Stomach anti-<br>inflammatory                                     | [46]          | Anti-inflammatory<br>[151,154] | Anti-inflammatory: MeOH<br>extract rich in rosmarinic,<br>ursolic, caffeic, and<br>oleanolic acids; borneol<br>[154]  |
|                                             | Leaves<br>(infusion,<br>drunk or for<br>baths,<br>alcoholic<br>macerate)              | Med | GC  | Tonic and corroborant                                             | [33]          |                                |                                                                                                                       |
|                                             | Leaves<br>(ointment)                                                                  | Med | SK  | Anti-inflammatory,<br>disinfectant, wound<br>healing              |               | Anti-inflammatory<br>[151,154] | Wound healing [156]                                                                                                   |

|                          |                                                                         |     |     |                                                                                                                   |                                                               |                                                                                                 |                                                                                          |
|--------------------------|-------------------------------------------------------------------------|-----|-----|-------------------------------------------------------------------------------------------------------------------|---------------------------------------------------------------|-------------------------------------------------------------------------------------------------|------------------------------------------------------------------------------------------|
|                          |                                                                         |     |     | Sunburn, burns,<br>frostbites, redness, and<br>rash                                                               |                                                               |                                                                                                 |                                                                                          |
|                          | Leaves<br>(inhalations<br>with infusion)                                | Med | RES | Expectorant,<br>decongestant, emollient                                                                           | [33,35,36,46,9<br>0]<br>[37,44]<br>(External use)             | [157–160]                                                                                       |                                                                                          |
|                          | Leaves<br>(infusion)                                                    | Med | DIG | Antispasmodic<br>(stomach)                                                                                        | [59,158,159,1<br>63–166]                                      | Spasmolytic (ileum<br>and colon) [167]                                                          |                                                                                          |
|                          | Leaves<br>(infusion)<br>Alone or with<br>lemon, ginger,<br>and lavender | Med | DIG | Digestive                                                                                                         | [33,35,58,60]                                                 |                                                                                                 |                                                                                          |
| <i>Thymus</i> spp.       | Leaves<br>(compresses<br>with infusion)                                 | Med | MSK | Contusions                                                                                                        | [163]                                                         | Anti-inflammatory<br>[162]                                                                      | Antibacterial, antioxidant:<br>phenolic compounds,<br>carvacrol, thymol<br>[158,161]     |
| Timo/Thyme               | Leaves<br>(infusion)<br>Alone or with<br>lemon, ginger,<br>and lavender | Med | RES | Bronchitis<br>Expectorant,<br>decongestant, emollient<br>Sore throat and<br>hoarseness<br>Facilitates respiration | [32,33,35–<br>37,44,46,59,60<br>,158,159,163,1<br>64,166,168] | [157–160]                                                                                       | Antibacterial: E.O.<br>(specifically thymol) [159]<br>Anti-inflammatory:<br>thymol [162] |
|                          | Leaves<br>(infusion)                                                    | Med | GC  | Anti-inflammatory                                                                                                 | [158]                                                         | Anti-inflammatory<br>[162]                                                                      |                                                                                          |
|                          | Leaves<br>(ointment)                                                    | Med | SK  | Anti-inflammatory,<br>disinfectant, wound<br>healing<br>Sunburn, burns,<br>frostbites, redness, and<br>rash       | [33]                                                          | Antibacterial and<br>wound healing [169]<br>Anti-inflammatory<br>[159,162]<br>Antioxidant [158] |                                                                                          |
| <b>Lauraceae</b>         |                                                                         |     |     |                                                                                                                   |                                                               |                                                                                                 |                                                                                          |
| <i>Laurus nobilis</i> L. | Leaves                                                                  | Med | RES | Expectorant,<br>decongestant, emollient                                                                           | [36]                                                          |                                                                                                 | Anti-inflammatory: EO<br>[170]; 1,8-cineole [171]                                        |

|                                                 |                                                                                       |     |     |                                                                             |                                                                        |
|-------------------------------------------------|---------------------------------------------------------------------------------------|-----|-----|-----------------------------------------------------------------------------|------------------------------------------------------------------------|
| Alloro                                          | (inhalations<br>with infusion)                                                        |     |     |                                                                             |                                                                        |
|                                                 | Leaves<br>(decoction)                                                                 | Med | GC  | Anti-inflammatory                                                           | Anti-inflammatory<br>[170,171]                                         |
|                                                 | Leaves<br>(decoction)                                                                 | Med | GC  | Depurative                                                                  |                                                                        |
|                                                 | Leaves<br>(infusion)                                                                  | Med | OTH | Aftermath of<br>drunkennes                                                  |                                                                        |
|                                                 | Leaves<br>(infusion)                                                                  | Med | CS  | Ipotensivo<br>Migliora la funzionalità<br>cardiaca                          | Antihypertensive<br>[172]                                              |
|                                                 | Leaves<br>(infusion,<br>drunk or for<br>baths,<br>alcoholic<br>macerate,<br>external) | Med | MSK | Rheumatic pains<br>Pain and inflammation<br>Muscle pain and<br>inflammation | Anti-inflammatory<br>[171]                                             |
|                                                 | Leaves<br>(infusion)                                                                  | Med | NS  | Mal di testa                                                                | [32] (External<br>use)                                                 |
| <b>Linaceae</b>                                 |                                                                                       |     |     |                                                                             |                                                                        |
| <i>Linum<br/>usitatissimum</i> L.<br>Lino/Flax  | Seeds<br>(flax flour<br>mixed with<br>hot water,<br>applied in the<br>chest)          | Med | RES | Expectorant,<br>decongestant, emollient<br>Cough                            | [35–<br>37,46,59,60]<br>[90] (Oral use)<br>[34](Above<br>ground parts) |
| <b>Malvaceae</b>                                |                                                                                       |     |     |                                                                             |                                                                        |
| <i>Alcea rosea</i> L.<br>Malvone/Hollyhoc<br>ks | Above<br>ground parts<br>(infusion)                                                   | Med | RES | Sore throat and<br>hoarseness                                               |                                                                        |

|                                            |                                                                                                                                                                   |     |     |                                                                                          |                         |                            |                                                         |
|--------------------------------------------|-------------------------------------------------------------------------------------------------------------------------------------------------------------------|-----|-----|------------------------------------------------------------------------------------------|-------------------------|----------------------------|---------------------------------------------------------|
|                                            | Flowers/inflor<br>escences/flow<br>ering tops<br>Leaves<br>Above<br>ground parts<br>(infusion,<br>decoction,<br>drunk or<br>compresses<br>and<br>mouthwashes<br>) | Med | OR  | Anti-inflammatory<br>Gingivitis, toothache,<br>aphthae, and abscesses<br>Tonsillitis     | [34–36,45,46]           | [173–176]                  | Anti-inflammatory:<br>flavonoids and mucilages<br>[175] |
| <i>Malva sylvestris</i> L.<br>Malva/Mallow | Flowers/inflor<br>escences/flow<br>ering tops<br>Leaves<br>Above<br>ground parts<br>(infusion)                                                                    | Med | DIG | Bowel anti-<br>inflammatory<br>Bowel depurative<br>Belly ache<br>Laxative, bowel transit | [33,34,36,45,4<br>6,90] | Anti-inflammatory<br>[176] | Anti-inflammatory:<br>mucilaginous complex<br>[177]     |
|                                            | Leaves<br>(infusion)                                                                                                                                              | Med | DIG | Digestive<br>Stomachache<br>Antispasmodic<br>(stomach)                                   | [34,60]                 |                            | Anti-inflammatory:<br>polyphenols [173]                 |
|                                            | Leaves<br>(infusion)                                                                                                                                              | Med | NS  | Sedative hypnotic,<br>promotes sleep                                                     | [34]                    | [175]                      | Anti-inflammatory:<br>Malvidin-3-glucoside<br>[178]     |
|                                            | Leaves<br>(eaten cooked,<br>in soup)                                                                                                                              | Med | GC  | Depurative                                                                               |                         |                            |                                                         |
|                                            | Flowers/inflor<br>escences/flow<br>ering tops<br>Leaves<br>Above<br>ground parts                                                                                  | Med | GC  | Anti-inflammatory                                                                        |                         | Anti-inflammatory<br>[176] |                                                         |

|                                                        |     |     |                                                                                                                                                                      |            |                            |
|--------------------------------------------------------|-----|-----|----------------------------------------------------------------------------------------------------------------------------------------------------------------------|------------|----------------------------|
| (infusion,<br>decoction)                               |     |     |                                                                                                                                                                      |            |                            |
| Leaves<br>(externally<br>applied on the<br>cheek)      | Med | OR  | Gingivitis, toothache,<br>aphthae, and abscesses                                                                                                                     | [45]       |                            |
| Leaves<br>(decoction)                                  | Med | SK  | Hands and feet mycosis                                                                                                                                               |            |                            |
| Leaves<br>(infusion)                                   | Med | SK  | Anti-inflammatory,<br>disinfectant, wound<br>healing<br>Anti-inflammatory,<br>emollient, soothing,<br>redness<br>Sunburn, burns,<br>frostbites, redness, and<br>rash | [33–36,46] | [175,176,178–181]          |
| Leaves<br>Above<br>ground parts<br>(infusion)          | Med | SL  | Slimming                                                                                                                                                             |            |                            |
| Leaves<br>(infusion,<br>drunk or<br>vaginal<br>douche) | Med | UR  | Cystitis and other<br>urinary tract<br>inflammations<br>Depurative<br>Diuretic                                                                                       | [60]       | [176,182]                  |
| Leaves<br>(compresses<br>with infusion)                | Med | MSK | Joint pain and<br>inflammation                                                                                                                                       | [34]       | Anti-inflammatory<br>[176] |
| Leaves<br>(infusion,<br>vaginal<br>douche)             | Med | GYN | Anti-inflammatory and<br>soothing, redness                                                                                                                           | [33–36]    | Anti-inflammatory<br>[176] |
| Leaves<br>(infusion)                                   | Med | RES | Bronchitis                                                                                                                                                           | [33,34,36] | [183] (Herbal mixture)     |

|                                                                       |                                                                                                                         |     |     |                                                                                                                                                                 |                             |
|-----------------------------------------------------------------------|-------------------------------------------------------------------------------------------------------------------------|-----|-----|-----------------------------------------------------------------------------------------------------------------------------------------------------------------|-----------------------------|
|                                                                       |                                                                                                                         |     |     | Expectorant,<br>decongestant, emollient<br>Cold<br>Cough                                                                                                        |                             |
|                                                                       | Leaves<br>(infusion)                                                                                                    | Med | GC  | Infections                                                                                                                                                      |                             |
|                                                                       | Above<br>ground parts<br>(infusion)                                                                                     | Med | CS  | Hypotensive                                                                                                                                                     |                             |
|                                                                       | Flowers/inflor<br>escences/flow<br>ering tops<br>Leaves<br>(decoction,<br>infusion,<br>bevuti o<br>suffumigi,<br>syrup) | Med | RES | Respiratory tract anti-<br>inflammatory<br>Expectorant,<br>decongestant, emollient<br>Sore throat and<br>hoarseness<br>Facilitates respiration<br>Cold<br>Cough | [33–<br>35,37,46,58,60<br>] |
| <i>Tilia cordata</i> Mill<br>Or<br><i>Tilia platyphyllos</i><br>Scop. | Flowers/inflor<br>escences/flow<br>ering tops<br>(compresses<br>con infusion)                                           | Med | SK  | Anti-inflammatory,<br>emollient, soothing,<br>redness<br>Sunburn, burns,<br>frostbites, redness, and<br>rash                                                    |                             |
| Tiglio/Limetree<br>Fiur de tej                                        | Flowers/inflor<br>escences/flow<br>ering tops<br>(infusion)                                                             | Med | DIG | Antiacid, gastritis, and<br>reflux<br>Ulcer                                                                                                                     |                             |
|                                                                       | Flowers/inflor<br>escences/flow<br>ering tops<br>(infusion)                                                             | Med | DIG | Digestive<br>Stomachache                                                                                                                                        | [33,34]                     |
|                                                                       | Flowers/inflor<br>escences/flow<br>ering tops                                                                           | Med | NS  | Sedative hypnotic,<br>promotes sleep                                                                                                                            | [32,33,35]                  |

|                                                                                          |                                                                            |     |     |                                                  |           |                                                                   |                                                                                |
|------------------------------------------------------------------------------------------|----------------------------------------------------------------------------|-----|-----|--------------------------------------------------|-----------|-------------------------------------------------------------------|--------------------------------------------------------------------------------|
|                                                                                          | Leaves<br>(infusion)                                                       |     |     |                                                  |           |                                                                   |                                                                                |
|                                                                                          | Flowers/inflor<br>escences/flow<br>ering tops<br>Leaves<br>(infusion)      | Med | GC  | Anti-inflammatory                                |           |                                                                   |                                                                                |
| <b>Moraceae</b>                                                                          |                                                                            |     |     |                                                  |           |                                                                   |                                                                                |
| <i>Ficus carica</i> L.<br>Fico/Fig                                                       | Latices<br>(applied)                                                       | Med | SK  | Warts and tags                                   | [45,46]   | [184]                                                             | Anti-warts: proteolytic<br>enzymes [184]                                       |
| <b>Myrtaceae</b>                                                                         |                                                                            |     |     |                                                  |           |                                                                   |                                                                                |
| <i>Eucalyptus<br/>globulus</i> Labill.<br>Eucalipto/Eucalyp<br>tus                       | Leaves<br>(decoction,<br>inhalations<br>with the<br>infusion)              | Med | RES | Cold<br>Cough                                    | [141]     | Airways anti-<br>inflammatory,<br>mucolytic, spasmolytic<br>[185] | Airways anti-<br>inflammatory, mucolytic,<br>spasmolytic: 1,8-cineole<br>[185] |
| <i>Syzygium<br/>aromaticum</i> (L.)<br>Merr. & L.M.Perry<br>Chiodi di<br>garofano/Cloves | Flowers/inflor<br>escences/flow<br>ering tops<br>(applied on<br>the tooth) | Med | OR  | Gingivitis, toothache,<br>aphthae, and abscesses | [186,187] | [188]                                                             | Antimicrobial:<br>Eugenol [188]                                                |
| <b>Oleaceae</b>                                                                          |                                                                            |     |     |                                                  |           |                                                                   |                                                                                |
| <i>Olea europaea</i> L.<br>Olivo/Olive tree                                              | Leaves<br>(infusion)                                                       | Med | GC  | Anti-inflammatory                                |           | Anti-inflammatory<br>(specifically, intestine)<br>[189]           | Leaves:<br>Anti-inflammatory:<br>Hydroxytyrosol [189]                          |
|                                                                                          | Fruits/infructe<br>scences/access<br>ory fruits<br>(oil)                   | Med | EAR | Otitis and pain                                  | [33,46]   | Anti-inflammatory<br>[190]<br>[193]<br>(Not enough evidence)      | Anti-inflammatory:<br>Oleanolic acid [190]<br>Olive oil:                       |



|                                                                           |                                                                          |     |     |                                                                                                 |                  |                                                                               |                                                                                                                                                                                                                                      |
|---------------------------------------------------------------------------|--------------------------------------------------------------------------|-----|-----|-------------------------------------------------------------------------------------------------|------------------|-------------------------------------------------------------------------------|--------------------------------------------------------------------------------------------------------------------------------------------------------------------------------------------------------------------------------------|
|                                                                           | Fruits/infructescences/accessory fruits (oil and bee wax based ointment) | Med | SK  | Anti-inflammatory, disinfectant, wound healing<br>Sunburn, burns, frostbites, redness, and rash | [45,46]          | Anti-inflammatory and wound healing [191,192]                                 | Anti-inflammatory and wound healing; polyphenols [191,192]                                                                                                                                                                           |
| <b>Papaveraceae</b>                                                       |                                                                          |     |     |                                                                                                 |                  |                                                                               |                                                                                                                                                                                                                                      |
| <i>Chelidonium majus</i> L.<br>Chelidonio/Celandine<br>Erba dei porri     | Leaves and stems, latex (applied on the part)                            | Med | SK  | Anti-inflammatory, disinfectant, wound healing<br>Verruche e porri                              | [33–37,44–46,60] | [194,195]                                                                     |                                                                                                                                                                                                                                      |
| <b>Pinaceae</b>                                                           |                                                                          |     |     |                                                                                                 |                  |                                                                               |                                                                                                                                                                                                                                      |
| <i>Abies alba</i> Mill.<br>Abete bianco/European silver fir               | Resin (applied as it is)                                                 | Med | SK  | Anti-inflammatory, disinfectant, wound healing                                                  | [60]             |                                                                               |                                                                                                                                                                                                                                      |
|                                                                           | Resin (ointment)                                                         | Med | MSK | Contusions                                                                                      | [32,60]          |                                                                               |                                                                                                                                                                                                                                      |
| <i>Picea abies</i> (L.) H.Karst.<br>Abete rosso/European spruce<br>Pigher | Resin (applied as it is)                                                 | Med | SK  | Anti-inflammatory, disinfectant, wound healing                                                  | [34–36]          | Antibacterial, wound healing [196,197]<br><br>Improves reepithelization [198] | Antibacterial, wound healing; diterpenes (abietic, neoabietic, dehydroabietic, pimaric, isopimaric, levopimaric, sandracopimaric, and palustric acids); lignans (pinosresinol, lariciresinol, and matairesinol); cinnamic acid [197] |
| <i>Pinus mugo</i> Turra                                                   | Immature cones, buds (syrup)                                             | Med | RES | Sore throat and hoarseness<br>Cough                                                             | [32–37,60]       | [199,200]                                                                     |                                                                                                                                                                                                                                      |

|                                                                                 |                                             |     |     |                                                |                        |                            |                                                                                         |
|---------------------------------------------------------------------------------|---------------------------------------------|-----|-----|------------------------------------------------|------------------------|----------------------------|-----------------------------------------------------------------------------------------|
| Pino mugo/Dwarf mountain pine                                                   |                                             |     |     |                                                |                        |                            |                                                                                         |
| <i>Pinus</i> spp<br>Pino/Pine                                                   | Resin<br>(applied as it is)                 | Med | SK  | Anti-inflammatory, disinfectant, wound healing | [33,46,60]             | [198]                      |                                                                                         |
| <b>Plantaginaceae</b>                                                           |                                             |     |     |                                                |                        |                            |                                                                                         |
| <i>Plantago lanceolata</i> L.<br>Piantaggine lanceolata/<br>Narrowleaf plantain | Leaves<br>(applied on the part)             | Med | SK  | Insect bites                                   | [32–37,58]             | Anti-inflammatory<br>[201] | Anti-inflammatory: maybe correlation with content of apigenin and ursolic acid<br>[201] |
|                                                                                 | Leaves<br>(applied on the part)             | Med | SK  | Sunburn, burns, frostbites, redness, and rash  | [36,37]                | [201–203]                  |                                                                                         |
| <i>Plantago major</i> L.<br>Piantaggine maggiore/Great plantain                 | Leaves<br>(applied on the part)             | Med | SK  | Insect bites                                   | [44,58]                | [201,204–206]              | Anti-inflammatory: maybe correlation with content of apigenin and ursolic acid<br>[201] |
|                                                                                 | Leaves<br>(infusion)                        | Med | GC  | Tonic and corroborant                          | [36]                   |                            |                                                                                         |
| <i>Plantago</i> spp.<br>Piantaggine/Plantain                                    | Leaves<br>(applied on the part)             | Med | SK  | Anti-inflammatory, disinfectant, wound healing | [32,33,36,37,45,46,58] | [201–206]                  | Anti-inflammatory: maybe correlation with content of apigenin and ursolic acid<br>[201] |
|                                                                                 | Leaves<br>(poultice applied on the stomach) | Med | DIG | Stomachache                                    |                        |                            |                                                                                         |
| <b>Poaceae</b>                                                                  |                                             |     |     |                                                |                        |                            |                                                                                         |
| <i>Cynodon dactylon</i> (L.) Pers.<br>Gramigna/Spear grass<br>Gramègna          | Leaves<br>(infusion)                        | Med | MSK | Arthritis                                      |                        | [207]                      |                                                                                         |
|                                                                                 | Underground organs<br>(infusion)            | Med | UR  | Cystitis and other urinary tract inflammations | [33,45,46,60]          | [208,209]                  |                                                                                         |

|                                                                     |                                                             |     |     |                         |                                                |                                                                          |
|---------------------------------------------------------------------|-------------------------------------------------------------|-----|-----|-------------------------|------------------------------------------------|--------------------------------------------------------------------------|
| <i>Zea mays</i> L.<br>Mais,<br>granturco/Corn<br>Melgòt             | Flowers/inflor<br>escences/flow<br>ering tops<br>(infusion) | Med | UR  | Diuretic                | [33,36]<br>Fruits [46]                         | [210]                                                                    |
| <b>Polygonaceae</b>                                                 |                                                             |     |     |                         |                                                |                                                                          |
| <i>Rumex acetosa</i> L.<br>Acetosa/Common<br>sorrel<br>Erba cœca    | Leaves<br>(eaten raw in<br>the fields or in<br>salads)      | Med | DIG | Laxative, bowel transit | [37,90]                                        |                                                                          |
| <i>Rumex alpinus</i> L.<br>Romice<br>alpino/Monk's-<br>rhubarb      | Leaves<br>(directly<br>applied)                             | Med | MSK | Pain and inflammation   | [34, 37]                                       |                                                                          |
| <i>Rumex obtusifolium</i><br>L.<br>Romice comune/<br>Bitter dock    | Leaves<br>(directly<br>applied)                             | Med | MSK | Contusions<br>Sprains   |                                                |                                                                          |
| <b>Polypodiaceae</b>                                                |                                                             |     |     |                         |                                                |                                                                          |
| <i>Polypodium vulgare</i><br>L.<br>Polipodio/<br>Common<br>polypody | Underground<br>organs<br>(eaten raw)                        | Med | DIG | Liver depurative        |                                                |                                                                          |
| <b>Portulacaceae</b>                                                |                                                             |     |     |                         |                                                |                                                                          |
| <i>Portulaca oleracea</i><br>L.                                     | Leaves                                                      | Med | GC  | Tonic and corroborant   | High content of<br>vitamins, minerals<br>[211] | Vitamins: vitamin A,<br>ascorbic acid, $\alpha$ -<br>tocopherol, niacin, |

|                                        |                                               |  |  |  |  |  |                                                                                                                                                                                                                                                  |
|----------------------------------------|-----------------------------------------------|--|--|--|--|--|--------------------------------------------------------------------------------------------------------------------------------------------------------------------------------------------------------------------------------------------------|
| Portulaca, erba<br>porcellana/Purslane | (eaten raw in<br>the fields and<br>in salads) |  |  |  |  |  | pyridoxine, and riboflavin.<br>Minerals: phosphorus,<br>manganese, iron, calcium,<br>selenium. Amino acids:<br>isoleucine, proline,<br>leucine, lysine,<br>phenylalanine,<br>methionine, cystine,<br>valine, threonine, and<br>tyrosine<br>[211] |
|----------------------------------------|-----------------------------------------------|--|--|--|--|--|--------------------------------------------------------------------------------------------------------------------------------------------------------------------------------------------------------------------------------------------------|

---

**Ranunculaceae**

---

|                                           |                                                  |     |     |                                                      |  |  |
|-------------------------------------------|--------------------------------------------------|-----|-----|------------------------------------------------------|--|--|
| <i>Clematis vitalba</i> L.                | Germogli<br>(eaten<br>cooked)                    | Med | DIG | Laxative, bowel transit                              |  |  |
| Clematide/ Old<br>man's beard<br>Ligabosc | Underground<br>organs<br>(externally<br>applied) | Med | SK  | Anti-inflammatory,<br>disinfectant, wound<br>healing |  |  |
| <i>Delphinium<br/>consolida</i> L.        | Leaves<br>(poultice)                             | Med | MSK | Contusions                                           |  |  |
| Erba cornetta/<br>Larkspur                | Leaves<br>(Poultice)                             | Med | MSK | Fractures                                            |  |  |

---

**Rosaceae**

---

|                                   |                                                                                                                                 |     |    |                                                      |                      |           |                                                                                                                                                                                                   |
|-----------------------------------|---------------------------------------------------------------------------------------------------------------------------------|-----|----|------------------------------------------------------|----------------------|-----------|---------------------------------------------------------------------------------------------------------------------------------------------------------------------------------------------------|
| <i>Agrimonia<br/>eupatoria</i> L. | Leaves<br>Above<br>ground parts<br>Whole plant<br>(applied as it<br>is, compresses<br>with the<br>infusion or<br>the decoction) | Med | SK | Anti-inflammatory,<br>disinfectant, wound<br>healing | [33](dermatitis<br>) | [212–216] | Anti-inflammatory (aerial<br>parts): polyphenols<br>(flavan-3-ols, quercetin,<br>kaempferol, apigenin, and<br>luteolin derivatives.<br>Agrimoniin, p-coumaric<br>acid, and ellagic acid)<br>[217] |
|-----------------------------------|---------------------------------------------------------------------------------------------------------------------------------|-----|----|------------------------------------------------------|----------------------|-----------|---------------------------------------------------------------------------------------------------------------------------------------------------------------------------------------------------|

|                                                                             |                                                                  |     |     |                                                      |                                                                                   |
|-----------------------------------------------------------------------------|------------------------------------------------------------------|-----|-----|------------------------------------------------------|-----------------------------------------------------------------------------------|
|                                                                             | Whole plant<br>(compresses<br>with the<br>decoction)             | Med | INF | Anti-inflammatory,<br>emollient, soothing            | Anti-inflammatory<br>[215]                                                        |
|                                                                             | Leaves<br>(infusion)                                             | Med | UR  | Prostate gland                                       |                                                                                   |
|                                                                             | Leaves<br>(compresses)                                           | Med | MSK | Contusions                                           | Anti-inflammatory<br>[215]                                                        |
|                                                                             | Leaves<br>(infusion)                                             | Med | GC  | Anti-inflammatory                                    | Anti-inflammatory<br>[215]                                                        |
|                                                                             | Above<br>ground parts<br>Whole plant<br>(infusion,<br>decoction) | Med | DIG | Stomachache                                          | [46] (anti-<br>inflammatory<br>for the<br>digestive tract)<br>[44]<br>(digestive) |
|                                                                             | Whole plant<br>(decoction as<br>mouthwashes<br>)                 | Med | OR  | Gingivitis, toothache,<br>aphthae, and abscesses     | Anti-inflammatory<br>[215]                                                        |
|                                                                             | Whole plant<br>(decoction)                                       | Med | DIG | Laxative, bowel transit                              |                                                                                   |
|                                                                             | Whole plant<br>(decoction,<br>drunk or as<br>vaginal<br>douche)  | Med | UR  | Cystitis and other<br>urinary tract<br>inflammations | Anti-inflammatory<br>[215]                                                        |
|                                                                             | Whole plant<br>(infusion)                                        | Med | UR  | Prostate gland                                       |                                                                                   |
| <i>Aronia melanocarpa</i><br>(Michx.) Elliot<br>Aronia/ black<br>chokeberry | Fruits/infructe<br>scences/access<br>ory fruits<br>(eaten)       | Med | DIG | Antinausea, antiemetic                               |                                                                                   |

|                                                                                                                  |                                                                             |     |     |                                                                  |                      |                          |
|------------------------------------------------------------------------------------------------------------------|-----------------------------------------------------------------------------|-----|-----|------------------------------------------------------------------|----------------------|--------------------------|
|                                                                                                                  | Flowers/inflor<br>escences/flow<br>ering tops<br>(infusion)                 | Med | CS  | Improves cardiac<br>function<br>Tachycardia,<br>antiarrhythmic   | [33,35,37,44,5<br>8] | Fruits<br>[119]<br>[218] |
| <i>Crataegus<br/>monogyna</i> Jacq.<br>Biancospino/Hawt<br>horn                                                  | Flowers/inflor<br>escences/flow<br>ering tops<br>(infusion)                 | Med | CS  | Hypotensive                                                      | [33,37,44]           | [218]                    |
|                                                                                                                  | Flowers/inflor<br>escences/flow<br>ering tops<br>Leaves<br>(infusion)       | Med | NS  | Sedative hypnotic,<br>promotes sleep                             | [33,37]              | [218]                    |
| <i>Malus<br/>sylvestris</i> (L.) Mill.<br>Melo/Apple tree<br>Specific cultivar:<br>Mela ruggine<br>(Rusty apple) | Fruits/infructe<br>scences/access<br>ory fruits<br>(eaten raw or<br>cooked) | Med | GC  | Tonic and corroborant                                            |                      |                          |
| <i>Prunus avium</i> L.<br>Ciliegio/Cherry<br>tree                                                                | Fruits' stalks<br>(infusion,<br>decoction)                                  | Med | UR  | Cystitis and other<br>urinary tract<br>inflammations<br>Diuretic | [35,46,60]           | [219]                    |
| <i>Prunus spinosa</i> L.<br>Prugnolo<br>selvatico/Blacktho<br>rn                                                 | Flowers/inflor<br>escences/flow<br>ering tops<br>(infusion)                 | Med | DIG | Laxative, bowel transit                                          | [33] (fruits)        |                          |
|                                                                                                                  | Flowers/inflor<br>escences/flow<br>ering tops<br>(infusion)                 | Med | UR  | Diuretic                                                         |                      |                          |

|                        |                                                                                   |     |     |                                                                  |                       |                                                      |
|------------------------|-----------------------------------------------------------------------------------|-----|-----|------------------------------------------------------------------|-----------------------|------------------------------------------------------|
|                        | Flowers/inflor<br>escences/flow<br>ering tops<br>(infusion)                       | Med | RES | Expectorant,<br>decongestant, emollient                          |                       |                                                      |
|                        | Flowers/inflor<br>escences/flow<br>ering tops<br>(infusion)                       | Med | GC  | Tonic and corroborant<br>(rich in vitamin C)                     |                       | Rich in vitamins,<br>specifically vitamin C<br>[220] |
|                        | Fruits/infructe<br>scences/access<br>ory fruits<br>(directly<br>applied)          | Med | SK  | Anti-inflammatory,<br>disinfectant, wound<br>healing             | [46]                  | [221,222]                                            |
|                        | Branches<br>rhytidome<br>(decoction)                                              | Med | FE  | Antipyretic                                                      | [45]                  |                                                      |
|                        | Fruits/infructe<br>scences/access<br>ory fruits<br>(Eaten,<br>infusions,<br>jams) | Med | GC  | Tonic and corroborant<br>(Rich in vitamin C)                     | [33,90]               | High Vitamin C<br>contents<br>[223]                  |
| <i>Rosa canina</i> L.  | Fruits/infructe<br>scences/access<br>ory fruits<br>(infusion)                     | Med | CS  | Varicose veins and<br>related pain                               |                       |                                                      |
| Rosa<br>canina/Dogrose | Fruits/infructe<br>scences/access<br>ory fruits<br>(infusion)                     | Med | DIG | Stomachache                                                      |                       | [223]                                                |
| Grata Cül              | Fruits/infructe<br>scences/access<br>ory fruits<br>(infusion)                     | Med | UR  | Cystitis and other<br>urinary tract<br>inflammations<br>Diuretic | [37]<br>[34] (leaves) | [224]                                                |

|                                |                                                          |     |     |                                                                                                  |                                       |                                              |                                                                           |
|--------------------------------|----------------------------------------------------------|-----|-----|--------------------------------------------------------------------------------------------------|---------------------------------------|----------------------------------------------|---------------------------------------------------------------------------|
|                                | Fruits/infructescences/accessory fruits (infusion)       | Med | NS  | Sedative hypnotic, promotes sleep                                                                | [34] (flowers)                        |                                              |                                                                           |
|                                | Fruits/infructescences/accessory fruits (infusion)       | Med | RES | Cough                                                                                            | [36]                                  |                                              |                                                                           |
|                                | Fruits/infructescences/accessory fruits (infusion)       | Med | GC  | Anti-inflammatory<br>Antioxidant                                                                 |                                       | Anti-inflammatory [223]                      |                                                                           |
|                                | Fruits/infructescences/accessory fruits (infusion)       | Med | GC  | Immunomodulant<br>(Traditionally attributed to Vitamin C contents)                               | [35,60]                               | High Vitamin C contents [223]                |                                                                           |
|                                | Flowers/inflor escences/flowering tops (eaten in salads) | Med | DIG | Liver depurative                                                                                 |                                       | [225]<br>(False fruits <i>R. laevigata</i> ) |                                                                           |
| <i>Rosa</i> spp<br><i>Rosa</i> | Flowers/inflor escences/flowering tops<br>Macerated oil  | Med | SK  | Anti-inflammatory, emollient, soothing, redness<br>Sunburn, burns, frostbites, redness, and rash | [45]                                  | Anti-inflammatory ( <i>R. rugosa</i> ) [225] | Anti-inflammatory (flowers <i>R. rugosa</i> )<br>Phenolic compounds [225] |
|                                | Flowers/inflor escences/flowering tops<br>Macerated oil  | Med | MSK | Muscle pain and inflammation                                                                     |                                       | Anti-inflammatory ( <i>R. rugosa</i> ) [225] |                                                                           |
| <i>Rubus ulmifolius</i> Schott | Seeds (put in a satchel and heated)                      | Med | MSK | Muscle pain and inflammation                                                                     | Similar use with cherry seeds in [34] | Heat therapy [226]                           |                                                                           |



|                                             |                                                                                                                                                |     |     |                               |  |
|---------------------------------------------|------------------------------------------------------------------------------------------------------------------------------------------------|-----|-----|-------------------------------|--|
| Rovo da<br>mora/Bramble                     |                                                                                                                                                |     |     |                               |  |
| <i>Sorbus aria</i> (L.)<br>Crantz           | Flowers/inflor<br>escences/flow<br>ering tops<br>(honey)                                                                                       | Med | RES | Sore throat and<br>hoarseness |  |
| Sorbo montano/<br>Common<br>whitebeam       |                                                                                                                                                |     |     |                               |  |
| <i>Sorbus aucuparia</i> L.                  | Flowers/inflor<br>escences/flow<br>ering tops<br>(honey)                                                                                       | Med | RES | Sore throat and<br>hoarseness |  |
| Sorbo degli<br>uccellatori/<br>Mountain ash |                                                                                                                                                |     |     |                               |  |
| <b>Rutaceae</b>                             |                                                                                                                                                |     |     |                               |  |
|                                             | Flowers/inflor<br>escences/flow<br>ering tops<br>(infusion)                                                                                    | Med | DIG | Antispasmodic<br>(stomach)    |  |
| <i>Citrus x limon</i> (L.)<br>Osbek         | Fruits/infructe<br>scences/access<br>ory fruits<br>(infusion)<br>(dandelion<br>flowers in<br>infusion with<br>lemon,<br>orange, and<br>raisin) | Med | DIG | Digestive                     |  |
| Limone/Lemon<br>tree                        |                                                                                                                                                |     |     |                               |  |
|                                             | Fruits/infructe<br>scences/access<br>ory fruits                                                                                                | Med | MSK | Sprains                       |  |

|                                                                                                                                                                   |     |     |                                                       |      |
|-------------------------------------------------------------------------------------------------------------------------------------------------------------------|-----|-----|-------------------------------------------------------|------|
| (applied as it is)                                                                                                                                                |     |     |                                                       |      |
| Fruits/infructescences/accessory fruits, juice<br>(drunk as it is with castor oil)                                                                                | Med | SK  | Anti-inflammatory, emollient, soothing, redness       | [44] |
| Fruits/infructescences/accessory fruits, peel<br>Fruits/infructescences/accessory fruits, juice<br>(eaten as it is or as a marmalade or as juice with castor oil) | Med | DIG | Laxative, bowel transit                               |      |
| Fruits/infructescences/accessory fruits, juice<br>(drunk as it is with honey and ginger)                                                                          | Med | RES | Sore throat and hoarseness<br>Facilitates respiration | [46] |
| Fruits/infructescences/accessory fruits, juice<br>(drunk with thyme,                                                                                              | Med | DIG | Digestive Antispasmodic (stomach)                     | [46] |

|                                                                                                                               |                                                                                                        |     |     |                      |               |                              |                                                                                                                                                  |
|-------------------------------------------------------------------------------------------------------------------------------|--------------------------------------------------------------------------------------------------------|-----|-----|----------------------|---------------|------------------------------|--------------------------------------------------------------------------------------------------------------------------------------------------|
|                                                                                                                               | ginger, and lavender)                                                                                  |     |     |                      |               |                              |                                                                                                                                                  |
| <i>Citrus sinensis</i> (L.)<br>Osbeck<br>Arancio/Orange tree                                                                  | Fruits/infructescences/accessory fruits (dandelion flowers in infusion with lemon, orange, and raisin) | Med | DIG | Digestive            |               |                              |                                                                                                                                                  |
| <i>Ruta graveolens</i> L.<br>Ruta/Rue                                                                                         | Underground organs (decoction)                                                                         | Med | GC  | Anti-inflammatory    |               | Anti-inflammatory [227,228]  | Anti-inflammatory: phenolic compounds (rutin, syringic acid, and naringenin) [227]<br>Anti-inflammatory: quinoline alkaloids (skimmianine) [228] |
| <b>Scrophulariaceae</b>                                                                                                       |                                                                                                        |     |     |                      |               |                              |                                                                                                                                                  |
| <i>Buddleja davidii</i> Franch.<br>Albero delle farfalle/Butterfly bush<br>Probably mistaken for <i>Vitex agnus-castus</i> L. | Unknowkn (Leaves or flowers) (infusion)                                                                | Med | OTH | Lowers male hormones |               |                              |                                                                                                                                                  |
| <i>Verbascum thapsus</i> L.<br>Tasso barbasso/<br>Great mullein                                                               | Leaves (infusion)                                                                                      | Med | RES | Cough                | [33,36,58–60] | Expectorant, mucolytic [229] | Effects on respiratory system: iridoid glycosides (catalpol, aucubin, saccatoside, harpagoside, harpagide); flavonoids                           |

(apigenin, luteolin, rutin, quercetin, kaempferol, cynaroside); polysaccharides, steroids and sterones, lignans, sesquiterpenes, terpenoid saponins and phenolic compounds (vanillic acid), phenylethanoid glycosides (verbascoside) [229]

**Solanaceae**

|                                              |                                               |     |     |                                               |               |                             |                                                                                                                  |
|----------------------------------------------|-----------------------------------------------|-----|-----|-----------------------------------------------|---------------|-----------------------------|------------------------------------------------------------------------------------------------------------------|
| <i>Solanum tuberosum</i> L.<br>Patata/Potato | Underground organs (applied as they are, raw) | Med | SK  | Sunburn, burns, frostbites, redness, and rash | [33,35]       | Anti-inflammatory [230–232] | Anti-inflammatory: glycoalkaloids ( $\alpha$ -chconine, $\alpha$ -solanine, solanidine) [230,231]                |
|                                              | Underground organs (applied as they are, raw) | Med | OPT | Eye anti-inflammatory                         | [33,34,36,45] | Anti-inflammatory [230–232] | Anti-inflammatory: isolated peptides [233]<br>Antioxidant: chlorogenic acid, proteins (patatins), peptides [231] |

**Urticaceae**

|                                          |                               |     |     |                                          |                     |       |  |
|------------------------------------------|-------------------------------|-----|-----|------------------------------------------|---------------------|-------|--|
| <i>Urtica dioica</i> L.<br>Ortica/Nettle | Leaves (infusion)             | Med | SK  | Against hair loss, strengthens the scalp | [32,37,58,60]       |       |  |
|                                          | Leaves (infusion)             | Med | UR  | Diuretic                                 | [33,36,37,59,60,90] | [233] |  |
|                                          | Leaves (external application) | Med | CS  | Improves circulation                     | [46]                |       |  |
|                                          | Leaves (eaten in soups)       | Med | RES | Bronchitis                               | [33]                |       |  |

|                                                                          |                                                                       |     |     |                                                                                            |                            |                                                                                                                                                                                                                                                                                                                                                          |
|--------------------------------------------------------------------------|-----------------------------------------------------------------------|-----|-----|--------------------------------------------------------------------------------------------|----------------------------|----------------------------------------------------------------------------------------------------------------------------------------------------------------------------------------------------------------------------------------------------------------------------------------------------------------------------------------------------------|
|                                                                          | Leaves<br>(eaten<br>cooked)                                           | Med | GC  | Tonic and corroborant                                                                      | [33,34,36,46]              | Rich in vitamins and<br>minerals<br>[233]                                                                                                                                                                                                                                                                                                                |
|                                                                          | Leaves<br>(infusion)                                                  | Med | GYN | Anti-inflammatory and<br>soothing, redness<br>Emmenagogue,<br>regulates menstrual<br>cycle | [36]                       | Anti-inflammatory<br>[234]                                                                                                                                                                                                                                                                                                                               |
|                                                                          | Above<br>ground parts<br>(external<br>application)                    | Med | MSK | Joint pain and<br>inflammation                                                             | [33,34,36,37,4<br>5,46,58] | Anti-inflammatory<br>[234]                                                                                                                                                                                                                                                                                                                               |
| <b>Verbenaceae</b>                                                       |                                                                       |     |     |                                                                                            |                            |                                                                                                                                                                                                                                                                                                                                                          |
| <i>Aloysia citrodora</i><br>Paláu<br>Verbena<br>odorosa/Lemon<br>verbena | Leaves<br>(infusion)                                                  | Med | GC  | Anti-inflammatory                                                                          |                            | [235]<br>Anti-inflammatory: citral<br>[235]                                                                                                                                                                                                                                                                                                              |
| <b>Viburnaceae</b>                                                       |                                                                       |     |     |                                                                                            |                            |                                                                                                                                                                                                                                                                                                                                                          |
|                                                                          | Flowers/inflor<br>escences/flow<br>ering tops<br>(infusion)           | Med | DIG | Laxative, bowel transit                                                                    | [33,34,36,58,9<br>0]       | [236]<br>Anthocyanins (Cyanidin-<br>3-sambubioside,<br>Chrysanthemine, Cyanidin-<br>3,5-diglucoside);<br>Proanthocyanidins<br>(epicatechin); Flavonoids<br>(Rutin, isoquercetin);<br>Peptic polysaccharides;<br>Lectins (SNA-IV, SNA-V)<br>of berries extracts:<br>immunostimulant,<br>antiviral (against flu), and<br>antimicrobial activities<br>[237] |
| <i>Sambucus nigra</i> L.<br>Sambuco<br>nero/Black elder                  | Flowers/inflor<br>escences/flow<br>ering tops<br>(infusion)           | Med | NS  | Sedative hypnotic,<br>promotes sleep                                                       | [35]                       |                                                                                                                                                                                                                                                                                                                                                          |
|                                                                          | Flowers/inflor<br>escences/flow<br>ering tops<br>(infusion,<br>syrup) | Med | RES | Expectorant,<br>decongestant, emollient<br>Sore throat and<br>hoarseness<br>Cold<br>Cough  | [32–37,44–46]              | [237–240]                                                                                                                                                                                                                                                                                                                                                |

|                                                      |                                                                                                       |     |     |                                                |                  |                         |
|------------------------------------------------------|-------------------------------------------------------------------------------------------------------|-----|-----|------------------------------------------------|------------------|-------------------------|
|                                                      | Fruits/infructescences/accessory fruits (syrup)                                                       | Med | RES | Cough                                          | [32–37,44–46]    | [237–240]               |
|                                                      | Flowers/infructescences/flowering tops (infusion)                                                     | Med | FE  | FE and infections                              | [35]             | [240]                   |
|                                                      | Fruits/infructescences/accessory fruits (syrup)                                                       | Med | DIG | Laxative, bowel transit                        | [33,34,36,58,90] | [236]                   |
|                                                      | Rhytidome (compresses with infusion)                                                                  | Med | SK  | Anti-inflammatory, disinfectant, wound healing | [35,44–46]       | Anti-inflammatory [241] |
| <b>Vitaceae</b>                                      |                                                                                                       |     |     |                                                |                  |                         |
| <i>Vitis aepyrena</i> L.<br>Uvetta/Raisin            | Fruits/infructescences/accessory fruits (infusion)<br>With dandelion flowers, lemon, and orange juice | Med | DIG | Digestive                                      |                  |                         |
| <i>Vitis labrusca</i> L.<br>Vite americana/Fox grape | Fruits/infructescences/accessory fruits (eaten as it is)                                              | Med | GC  | Tonic and corroborant                          |                  |                         |
| <i>Vitis vinifera</i> L.<br>Vite, uva/Grapes         | Pomace (grappa, mouthwashes)                                                                          | Med | OR  | Gingivitis, toothache, aphthae, and abscesses  | [46]             |                         |
|                                                      | Leaves                                                                                                | Med | MSK | Joint pain and inflammation                    |                  |                         |

(applied as they are)

**Xanthorrhoeaceae**

|                                               |             |     |    |                       |                         |                          |
|-----------------------------------------------|-------------|-----|----|-----------------------|-------------------------|--------------------------|
| <i>Aloe vera</i> (L.)<br>Burm.f.<br>Aloe/Aloe | Leaves, gel | Med | GC | Tonic and corroborant | Immunomodulant<br>[242] | Polysaccharides<br>[242] |
|-----------------------------------------------|-------------|-----|----|-----------------------|-------------------------|--------------------------|

**Zingiberaceae**

|                                                     |                                |     |     |                                                       |                                              |                                                                                |
|-----------------------------------------------------|--------------------------------|-----|-----|-------------------------------------------------------|----------------------------------------------|--------------------------------------------------------------------------------|
|                                                     | Underground organs (infusion)  | Med | RES | Sore throat and hoarseness<br>Facilitates respiration | [243]                                        |                                                                                |
| <i>Zingiber officinale</i> Roscoe<br>Zenzero/Ginger | Underground organs (infusion)  | Med | DIG | Antispasmodic (stomach)<br>Digestive                  | Gastroprotective and antiemetic<br>[243–245] | Anti-inflammatory: 6-shogaol and 6-gingerol, 6-dehydroshogaol, zingerone [243] |
|                                                     | Underground organs (decoction) | Med | GC  | Anti-inflammatory                                     | [243]                                        | Gastroprotective: zingerone [244]                                              |
|                                                     | Underground organs (decoction) | Med | GC  | Depurative                                            |                                              |                                                                                |
